# Supplementary material
Source: PubMed Central journal article supplement (PMC8210813)
Supplement: NIHMS1713526-supplement-Supplementary_Material.pdf [file NIHMS1713526-supplement-Supplementary_Material.pdf]

## Supporting Information

# Injectable Biodegradable Polymeric Complex for Glucose-Responsive Insulin Delivery

Jinqiang Wang<sup>‡,¶,†,§</sup>, Zejun Wang<sup>†,§</sup>, Guojun Chen<sup>†,§,▽</sup>, Yanfang Wang<sup>‡</sup>, Tianyuan Ci<sup>†,§</sup>, Hongjun Li<sup>‡,†,§</sup>,  
Xiangsheng Liu<sup>§,||</sup>, Daojia Zhou<sup>†,§</sup>, Anna R. Kahkoska<sup>‡</sup>, Zhuxian Zhou<sup>||</sup>, Huan Meng<sup>§,||,<sup>⊥</sup></sup>, John B. Buse<sup>‡</sup>,  
Zhen Gu<sup>‡,¶,||,||,†,§,<sup>⊥</sup>\*</sup>

<sup>‡</sup>College of Pharmaceutical Sciences, Zhejiang University, Hangzhou 310058, China;

<sup>¶</sup>MOE Key Laboratory of Macromolecular Synthesis and Functionalization, Department of Polymer Science and Engineering, Zhejiang University, Hangzhou 310027, China

<sup>||</sup>Department of General Surgery, Sir Run Run Shaw Hospital, School of Medicine, Zhejiang University, Hangzhou 310016, China;

<sup>||</sup>Zhejiang Laboratory of Systems & Precision Medicine, Zhejiang University Medical Center, Hangzhou 311121, China.

<sup>†</sup>Department of Bioengineering, University of California, Los Angeles, CA 90095, USA;

<sup>§</sup>California NanoSystems Institute, University of California, Los Angeles, CA 90095, USA;

<sup>||</sup>Division of NanoMedicine, Department of Medicine, David Geffen School of Medicine, Los Angeles, CA 90095, USA;

<sup>‡</sup>Department of Medicine, University of North Carolina School of Medicine, Chapel Hill, NC 27599, USA;

<sup>||</sup>Key Laboratory of Biomass Chemical Engineering of Ministry of Education and Center for Bionanoengineering, College of Chemical and Biological Engineering, Zhejiang University, Hangzhou 310027, China;

<sup>⊥</sup>Jonsson Comprehensive Cancer Center, University of California, Los Angeles, CA 90024, USA;

<sup>▽</sup>Department of Biomedical Engineering, and the Rosalind & Morris Goodman Cancer Research Center, McGill University, Montreal, QC H3G 0B1, Canada

\*E-mail: guzhen@zju.edu.cn

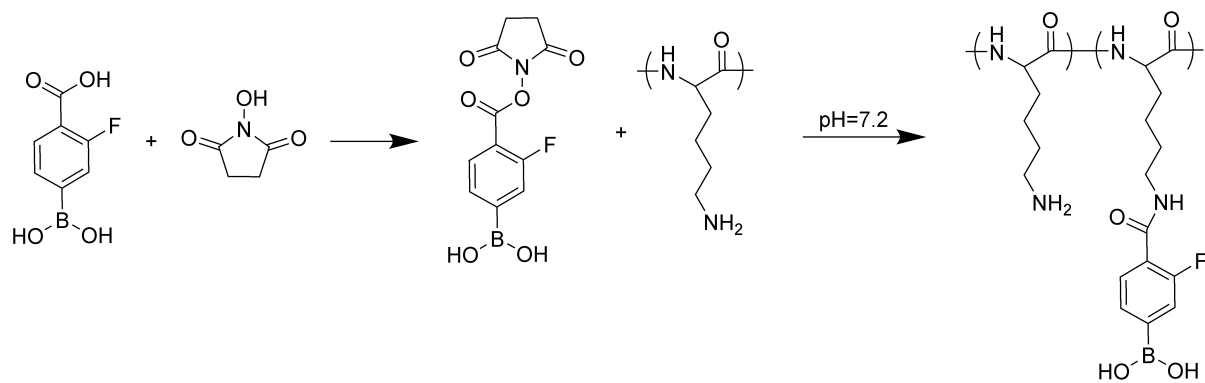

**Scheme S1.** Synthesis route of PLL-FPBA.

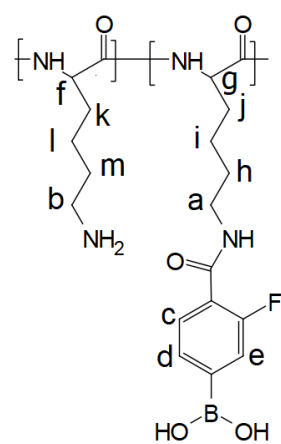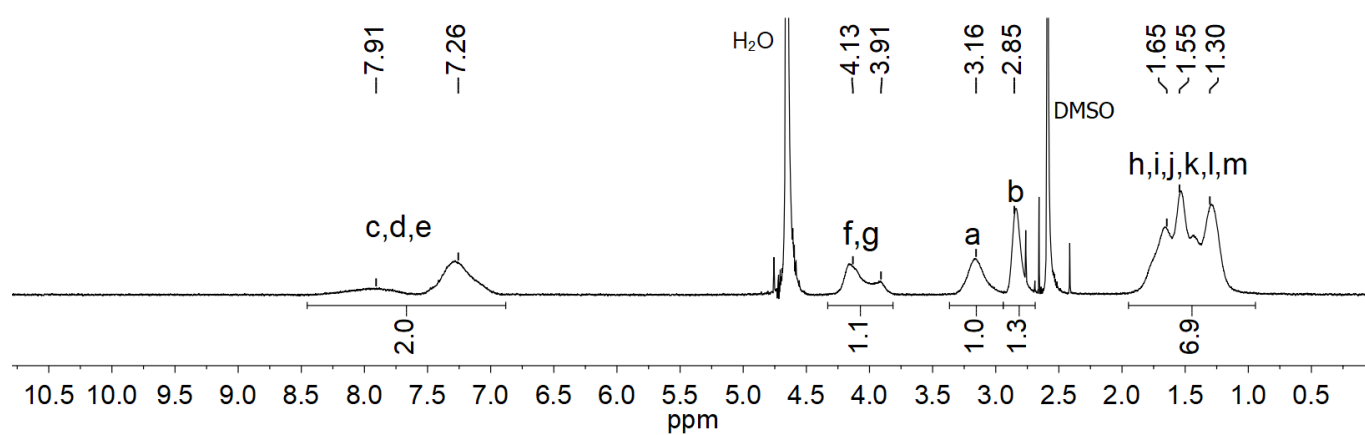

**Figure S1.**  $^1\text{H-NMR}$  spectrum of FPBA modified PLL<sub>4-15k</sub> in D<sub>2</sub>O with TFA to adjust its pH. About 43% of the amino groups in this polymer was reacted with FPBA-NHS.

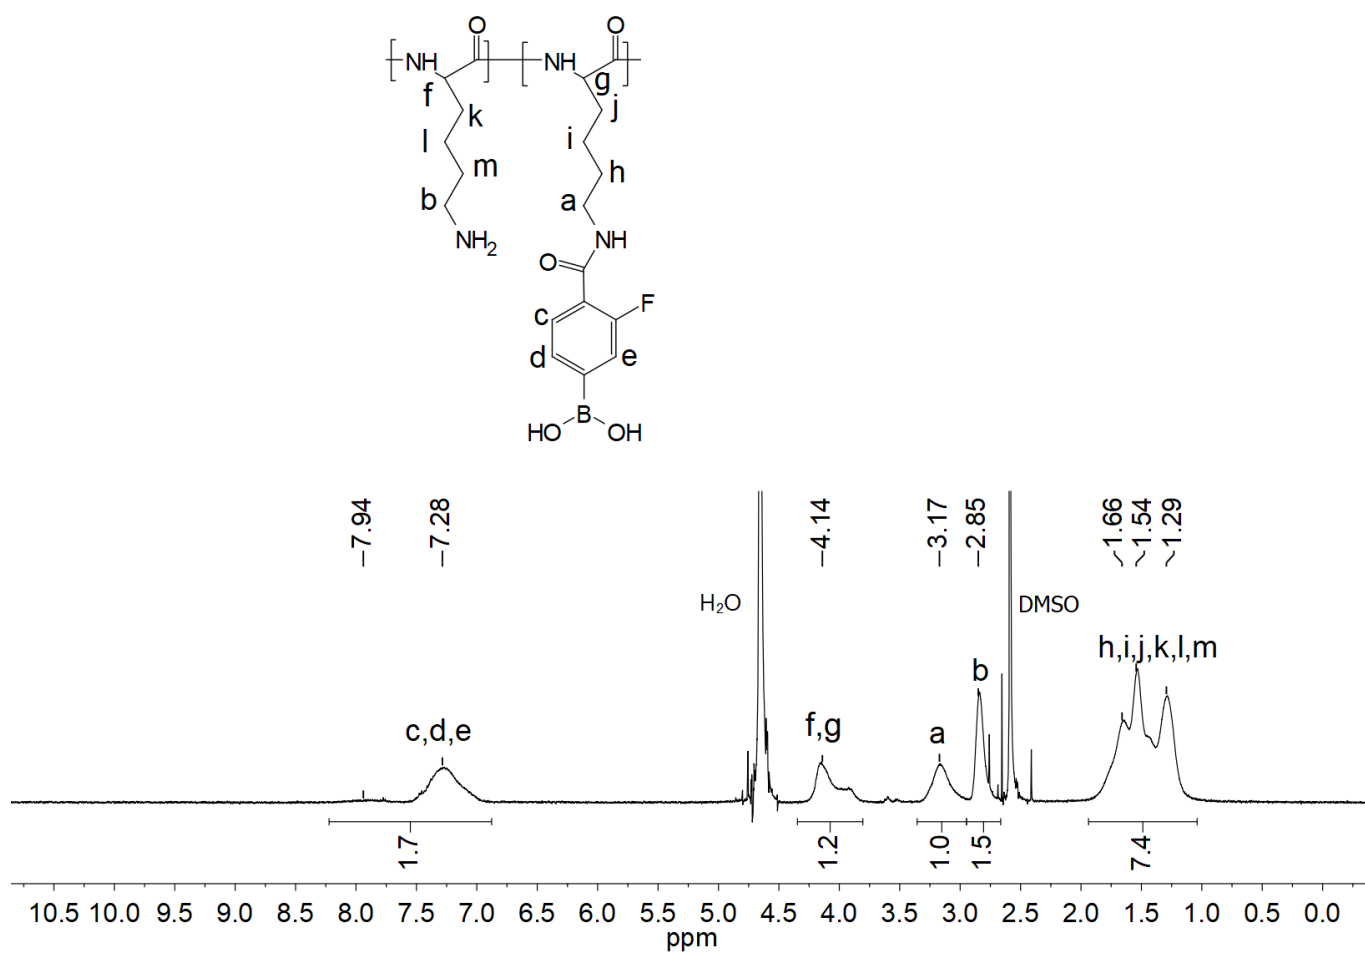

**Figure S2.** <sup>1</sup>H-NMR spectrum of FPBA modified PLL<sub>15-30k</sub> in D<sub>2</sub>O with TFA to adjust its pH. About 40% of the amino groups in this polymer was reacted with FPBA-NHS.

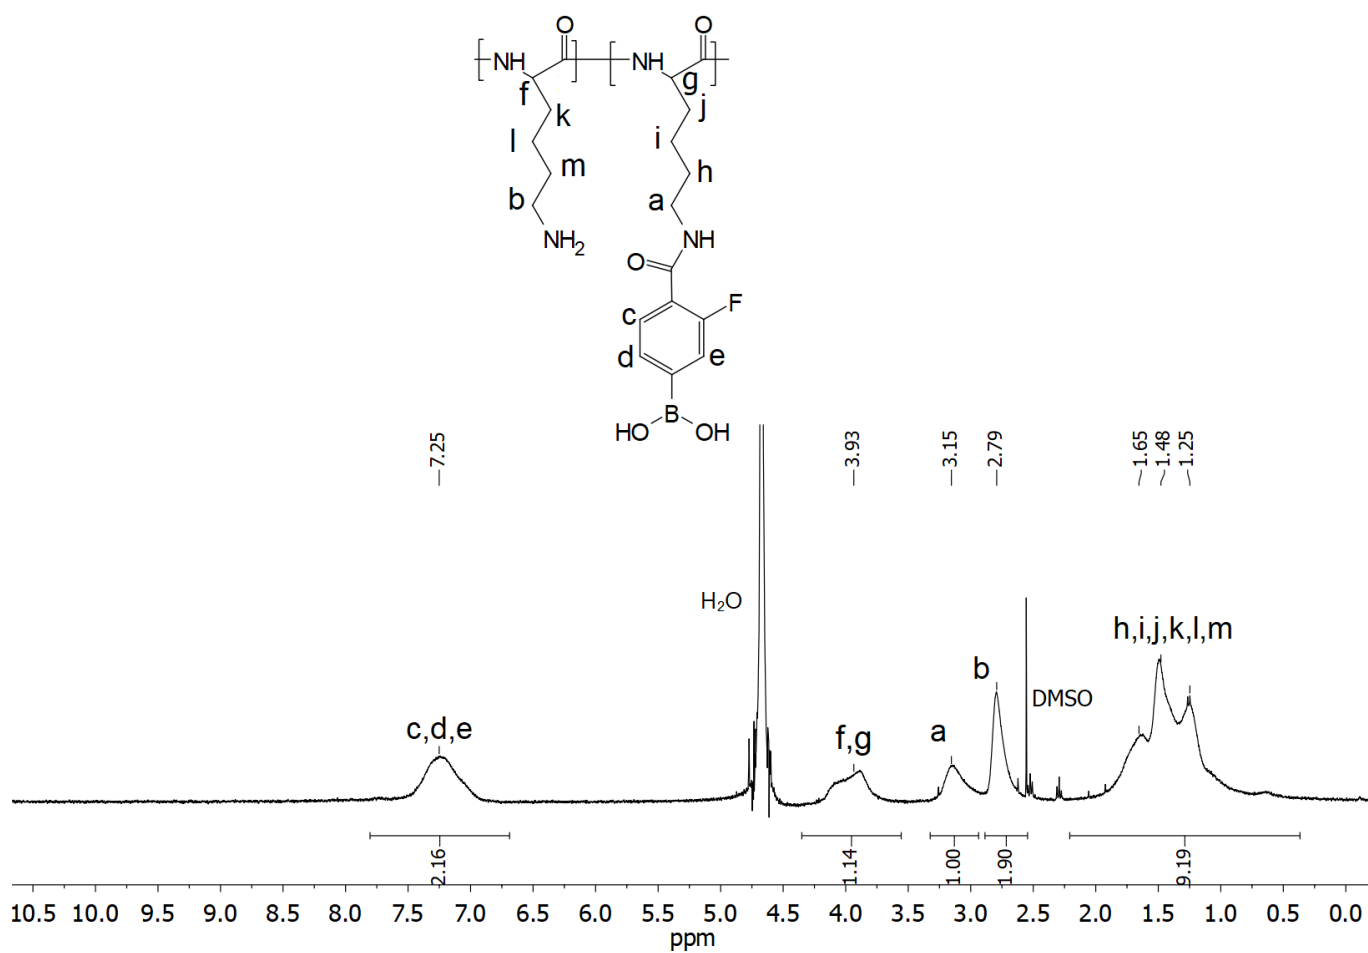

**Figure S3.** <sup>1</sup>H-NMR spectrum of FPBA modified PLL<sub>30k-70k</sub> in D<sub>2</sub>O with TFA to adjust its pH. About 35% of the amino groups in this polymer was reacted with FPBA-NHS.

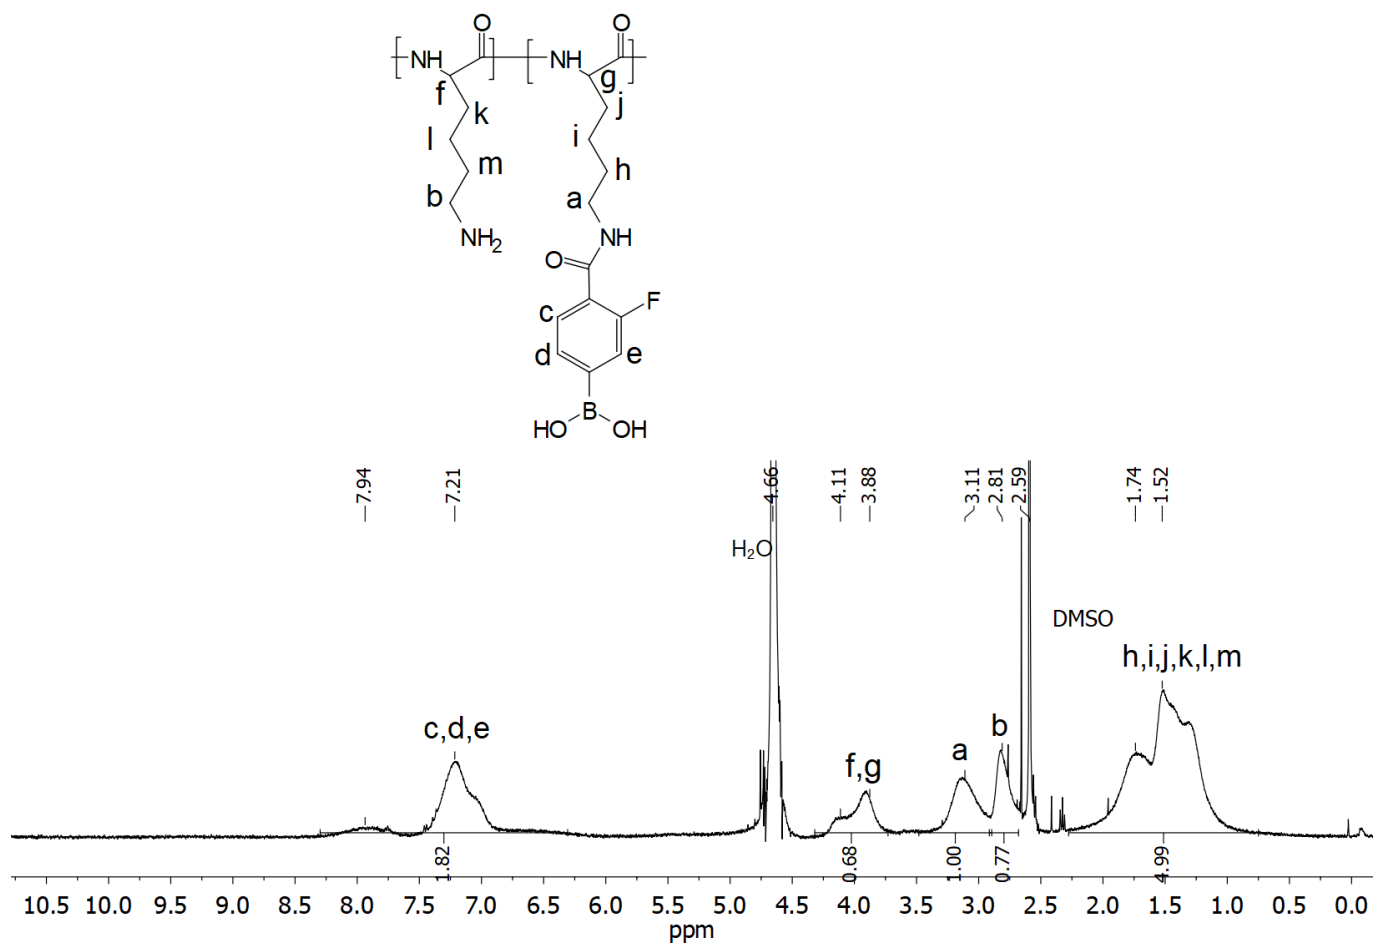

**Figure S4.** <sup>1</sup>H-NMR spectrum of FPBA modified PLL<sub>30-70k</sub> in D<sub>2</sub>O with TFA to adjust its pH. About 60% of the amino groups in this polymer was reacted with FPBA-NHS.

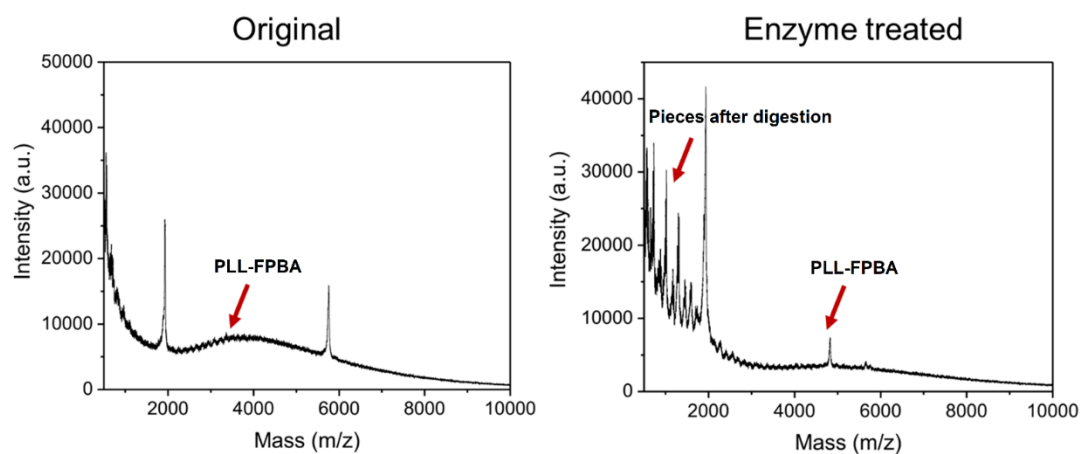

**Figure S5.** MALDI-TOF mass spectra of PLL<sub>0.4</sub>-FPBA<sub>0.6</sub> before and after enzyme digestion. The concentration of the polymer was 20 mg/mL, while the 0.1 mg/mL of trypsin was used. The polymer was incubated with trypsin at 37 °C overnight on a shaker (300 rpm).

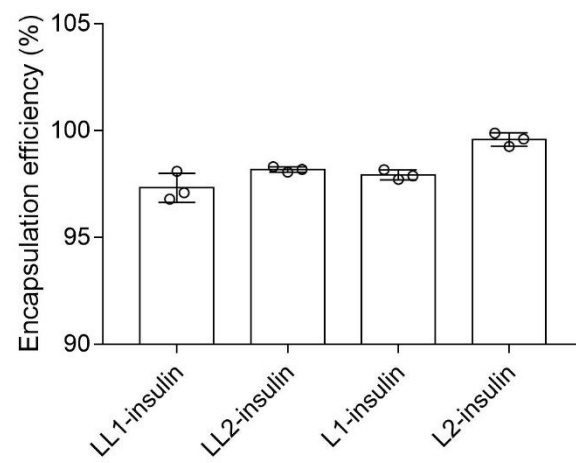

**Figure S6.** The encapsulation efficiency of insulin for various complexes. Data are mean  $\pm$  SD ( $n=3$ ).



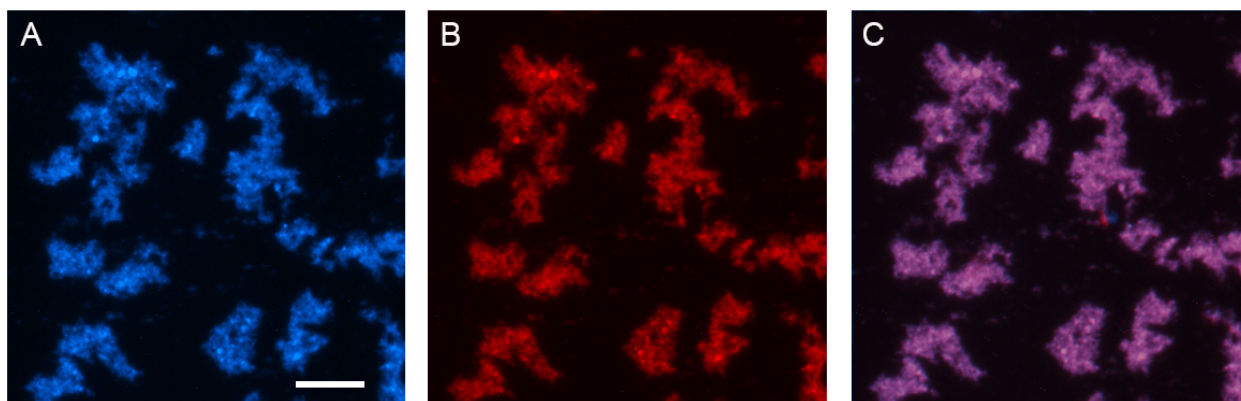

**Figure S7.** Fluorescence images of insulin complex. (A) Representative image of the complex observed from the channel of Cy5-labeled polymer. (B) Representative image of complex observed from the channel of Rhodamine B-labeled insulin. (C) Merge of images (A) and (B). Scale bar, 20  $\mu\text{m}$ .

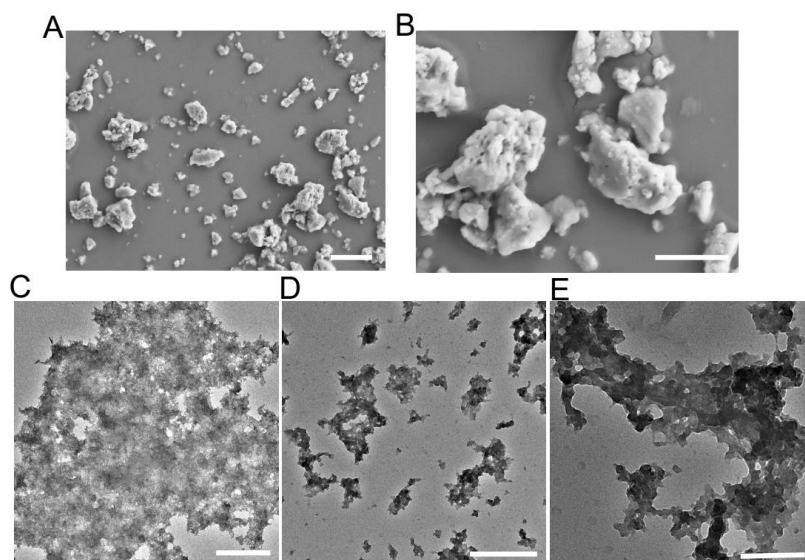

**Figure S8.** Representative SEM and TEM images of L2-insulin. (A-B) Representative SEM images of L2-insulin. Scale bars are 10  $\mu\text{m}$  (A) and 5  $\mu\text{m}$  (B), respectively. (C-E) Representative TEM images of L2-insulin. The complex was stained by phosphotungstic acid (2%). Complex particles with varied sizes were shown here. Scale bars are 1  $\mu\text{m}$  (C), 0.5  $\mu\text{m}$  (D), and 0.2  $\mu\text{m}$  (E), respectively.

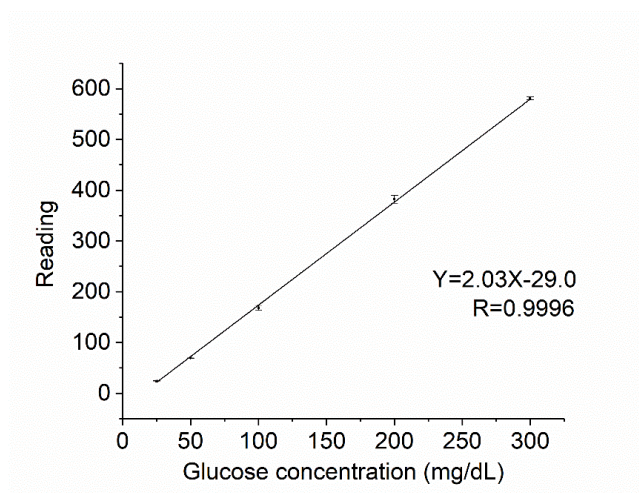

**Figure S9.** Glucose meter reading as a function of glucose concentration. Data are mean  $\pm$  SD ( $n=3$ ).

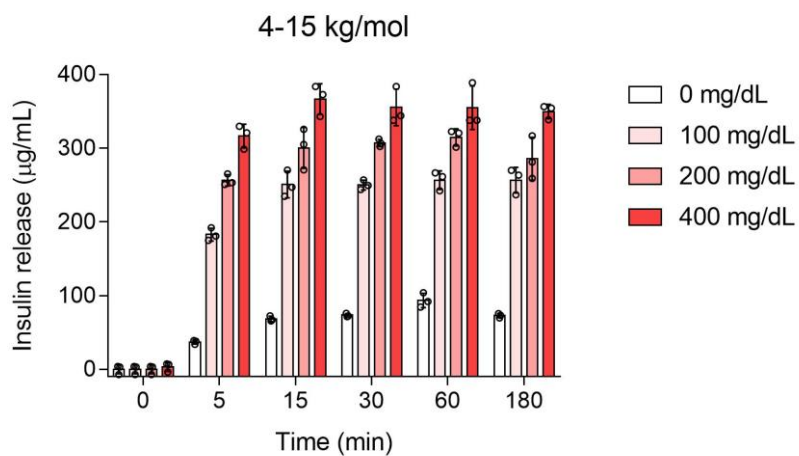

**Figure S10.** Glucose-responsive insulin release from complex prepared from an equal weight of insulin and PLL<sub>0.57</sub>-FPBA<sub>0.43</sub> with the original PLL MW of 4-15 kg/mol. Data are mean  $\pm$  SD ( $n=3$ ).

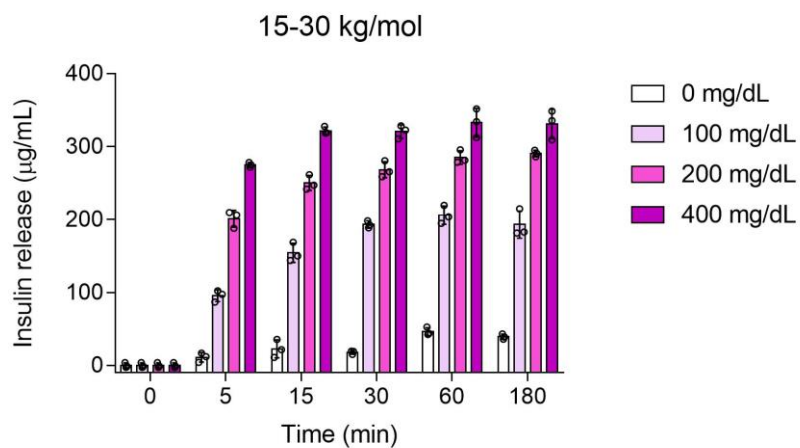

**Figure S11.** Glucose-responsive insulin release from complex prepared from an equal weight of insulin and PLL<sub>0.6</sub>-FPBA<sub>0.4</sub> with the original PLL MW of 15-30 kg/mol. Data are mean  $\pm$  SD ( $n=3$ ).

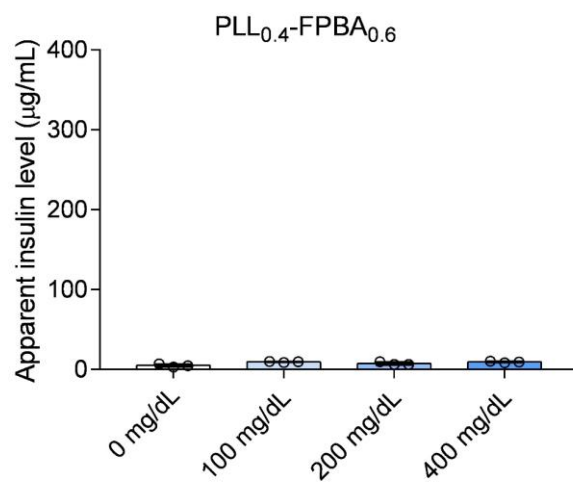

**Figure S12.** The glucose-dependent solubility of PLL<sub>0.4</sub>-FPBA<sub>0.6</sub> in PBS at pH 7.4. The original PLL has a MW of 30-70 kg/mol. The supernatant was centrifuged, collected, and measured using a Coomassie protein assay reagent. The apparent insulin level was calculated according to the standard curve of insulin. Data are mean  $\pm$  SD ( $n=3$ ).

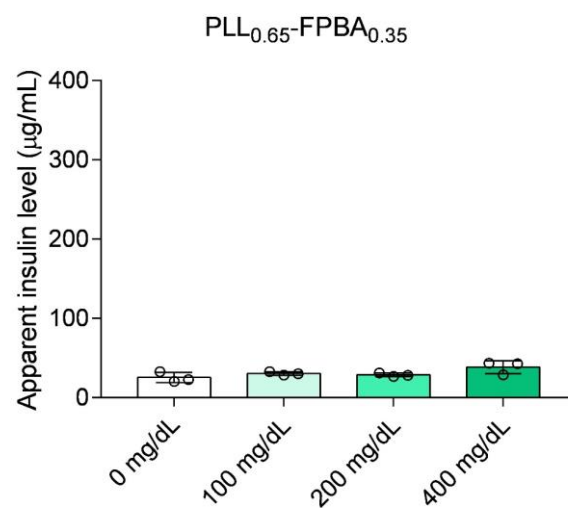

**Figure S13.** The glucose-dependent solubility of PLL<sub>0.65</sub>-FPBA<sub>0.35</sub> in PBS at pH 7.4. The original PLL has a MW of 30-70 kg/mol. The supernatant was centrifuged, collected, and measured using a Coomassie protein assay reagent. The apparent insulin level was calculated according to the standard curve of insulin. Data are mean  $\pm$  SD ( $n=3$ ).

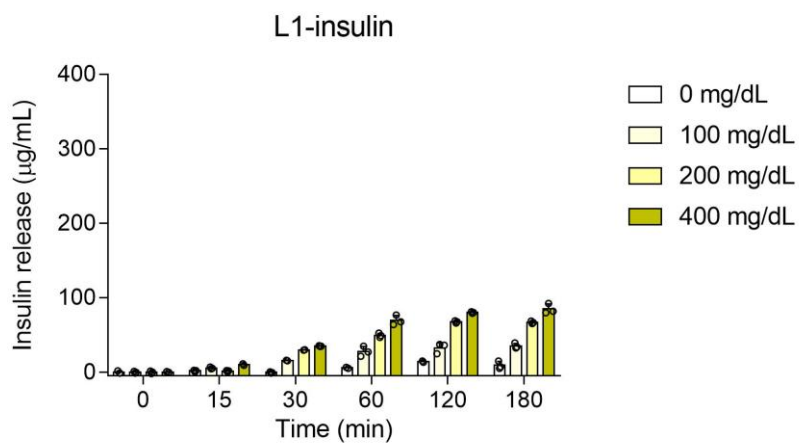

**Figure S14.** Glucose-dependent insulin release from bulk L1-insulin. L1-insulin was centrifuged (21,000 G, 10 min) to the bottom of Eppendorf tubes. The complex stayed as a bulk at the bottom during the whole experiment. Data are mean  $\pm$  SD ( $n=3$ ).



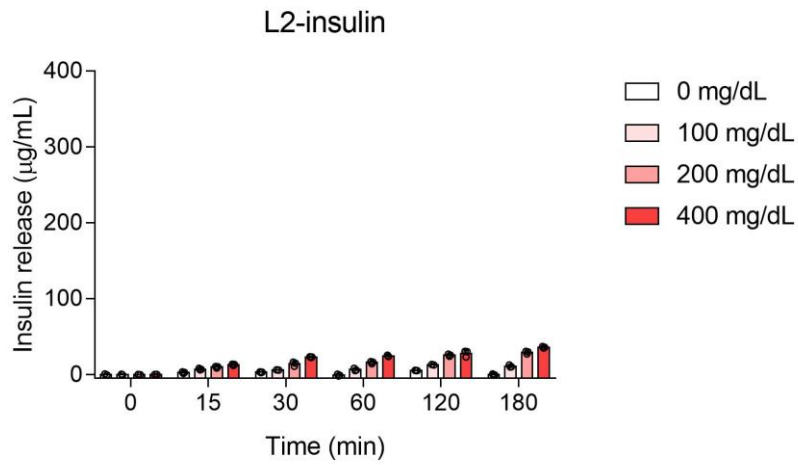

**Figure S15.** Glucose-dependent insulin release from bulk L2-insulin. L1-insulin was centrifuged (21,000 G, 10 min) to the bottom of Eppendorf tubes. The complex stayed as a bulk at the bottom during the whole experiment. Data are mean  $\pm$  SD ( $n=3$ ).

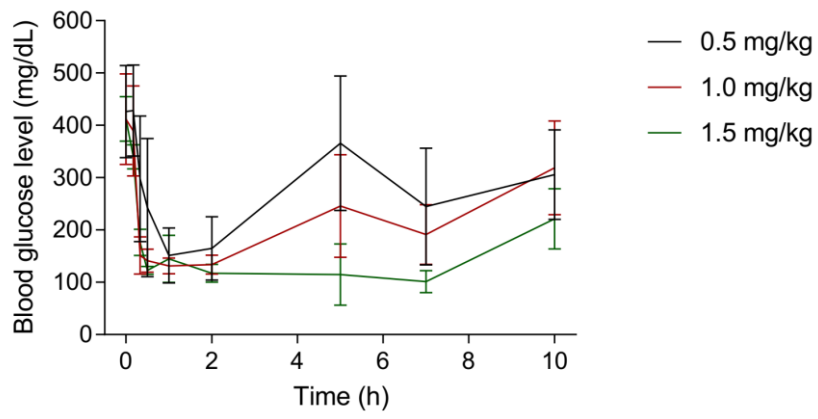

**Figure S16.** Dose-dependent blood glucose regulation ability of L1-insulin. Data are mean  $\pm$  SD ( $n=5$ ).

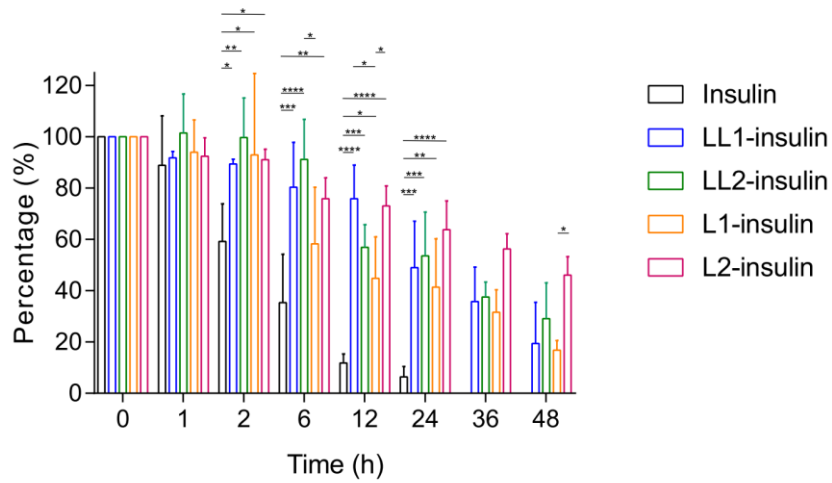

**Figure S17.** The statistical analysis of fluorescence intensity. Data are mean  $\pm$  SD ( $n=3$ ). Two-way ANOVA was used to calculate the difference among difference groups. Only  $P$  values with significant difference were shown.  $*P < 0.05$ ,  $**P < 0.01$ ,  $***P < 0.001$ ,  $****P < 0.0001$ .

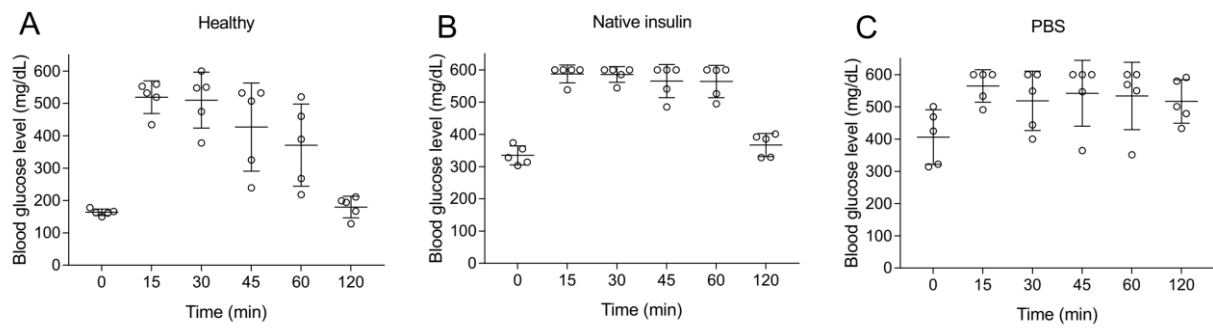

**Figure S18.** Intra-peritoneal glucose tolerance tests. Healthy mice (A) and diabetic mice receiving native insulin (B) or PBS (C) were used as control groups. The insulin-equivalent dose was set to 1.5 mg/kg. The glucose (3 g/kg) was given at 8 hours posttreatment with complexes. Data are mean  $\pm$  SD ( $n=5$ ).

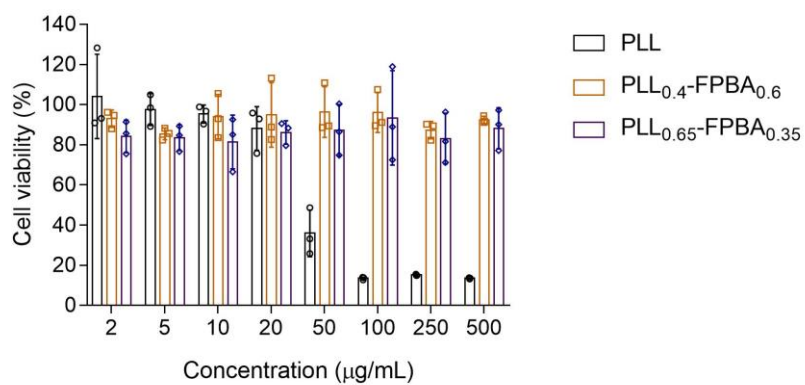

**Figure S19.** The dose-dependent cytotoxicity of PLL<sub>30-70k</sub>, PLL<sub>0.4</sub>-FPBA<sub>0.6</sub>, and PLL<sub>0.65</sub>-FPBA<sub>0.35</sub>. The cytotoxicity was evaluated on L929 murine fibroblast cells. Data are mean  $\pm$  SD ( $n=3$ ).

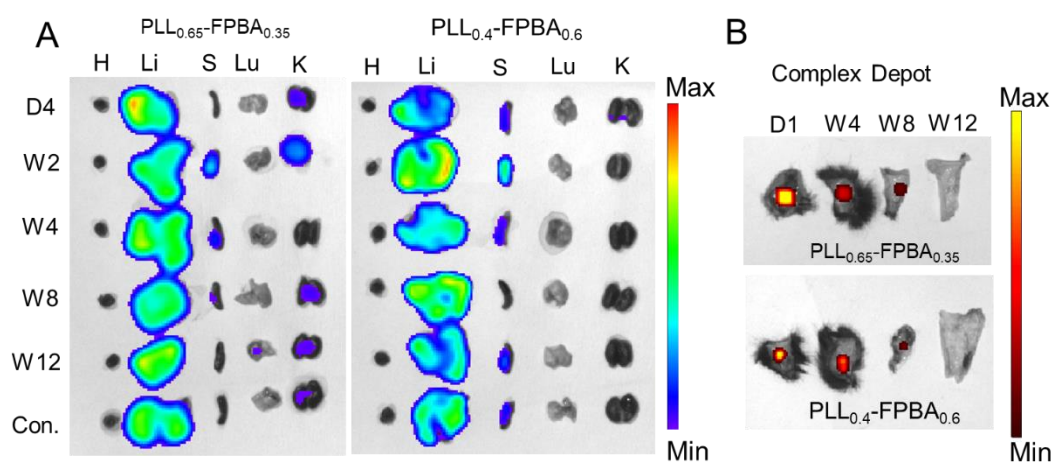

**Figure S20.** Biodistribution of the polymer after subcutaneous injection. Polymers were labeled with Cy5 and formed complexes LL2-insulin and L2-insulin before injection (1.5 mg/kg insulin-eq. dose). The organs (A) and the skins (B) were obtained between time intervals. IVIS spectrum was used to measure the fluorescence of each organ. H, heart; Li, liver; S, spleen; Lu, lung; K, kidney. Dn, n<sup>th</sup> day posttreatment; Wn, n<sup>th</sup> week posttreatment; Con., control group without treatment.

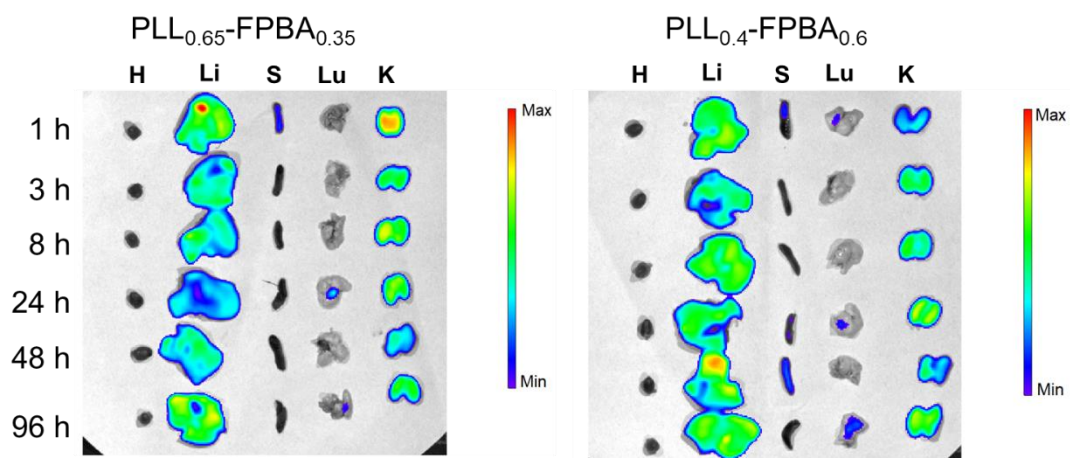

**Figure S21.** Biodistribution of the polymer after subcutaneous injection. Polymers were labeled with Cy5 and formed LL2-insulin and L2-insulin complexes before injection (1.5 mg/kg insulin eq. dose). The main organs were obtained between time intervals. IVIS spectrum was used to measure the fluorescence of each organ. H, heart; Li, liver; S, spleen; Lu, lung; K, kidney.

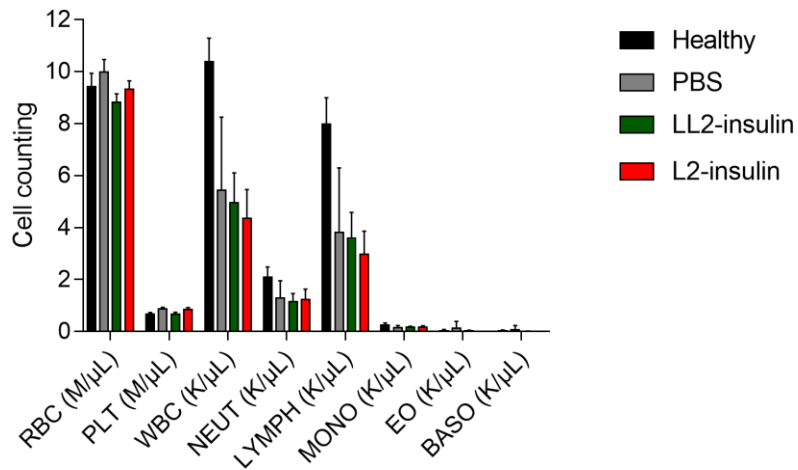

**Figure S22.** The effect of complex treatment on blood cell count. Diabetic mice were treated with LL2-insulin and L2-insulin every two days at a dose of 1.5 mg/kg. Diabetic mice receiving PBS and healthy mice were used as control groups. Data are mean  $\pm$  SD ( $n=5$ ). RBC, red blood cell; PLT, platelet; WBC, white blood cell; NEUT, neutrophil; LYMPH, lymphocyte; MONO, monocyte; EO, eosinophil; BASO, basophil.



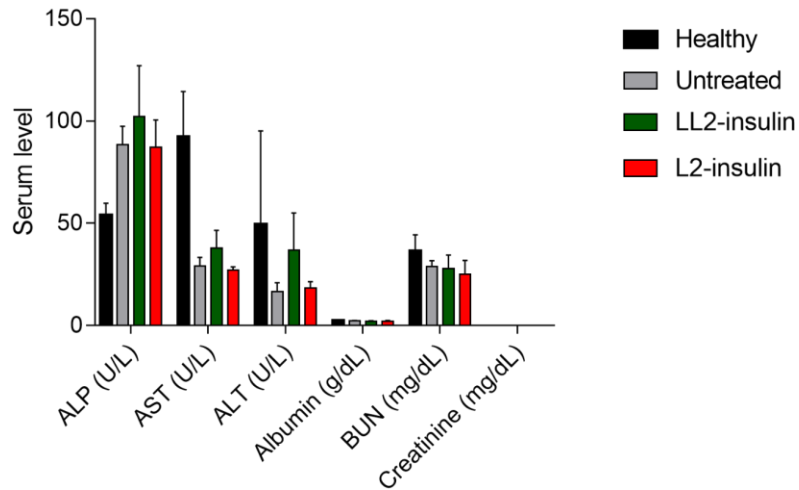

**Figure S23.** The effect of complex treatment on serum biochemical parameters indicating main organ healthiness. Diabetic mice were treated with LL2-insulin and L2-insulin every two days at a dose of 1.5 mg/kg for one week. Diabetic mice receiving PBS and healthy mice were used as control groups. Data are mean  $\pm$  SD ( $n=5$ ). ALP, alkaline phosphatase; AST, aspartate transaminase; ALT, alanine transaminase; BUN, blood urea nitrogen.

**Table S1.** General features of complexes.

| Polymer               | Abbreviation | Polymer to-insulin ratio (wt/wt) | N/C ratio (N, amine; C, carboxylic acid) | Z-averaged size (nm) | Zeta-potential (mV) in glucose solution (mg/dL) |             |             |
|-----------------------|--------------|----------------------------------|------------------------------------------|----------------------|-------------------------------------------------|-------------|-------------|
|                       |              |                                  |                                          |                      | 0                                               | 100         | 400         |
| PLL <sub>0.65</sub> - | LL1-insulin  | 1                                | 3.5                                      | 4569 ± 632           | 16.2 ± 4.2                                      | 10.0 ± 4.1  | 6.9 ± 1.0   |
| FPBA <sub>0.35</sub>  | LL2-insulin  | 2                                | 6.3                                      | 2527 ± 1217          | 20.9 ± 9.1                                      | 11.0 ± 2.1  | 7.2 ± 6.5   |
| PLL <sub>0.4</sub> -  | L1-insulin   | 1                                | 2.1                                      | 3295 ± 1476          | -2.5 ± 5.0                                      | -7.0 ± 1.1  | -11.9 ± 2.2 |
| FPBA <sub>0.6</sub>   | L2-insulin   | 2                                | 3.6                                      | 2451 ± 1470          | -1.6 ± 4.7                                      | -10.0 ± 2.6 | -16.1 ± 1.2 |

**Note:** Each insulin molecule has six carboxylic acid groups, three amino groups, and one guanidino group, which were all included in the calculation of N/C ratio. Phenylboronic acid groups were not included in the calculation even though they may carry negative charges. Data are presented as mean ± SD ( $n=3$ ).
